# Supplementary material for: Insights into ESIPT-induced multicolor fluorescence emission in 2-(2′-hydroxy-5′-bromo)phenylbenzimidazole: a spectroscopic and TDDFT study
Source: Royal Society of Chemistry journal article supplement (doi:10.1039/d4ra06147k), 2024-01-01
Supplement: d4ra06147k1.pdf [file d4ra06147k1.pdf]

## Supporting Information

### Synthesis of HBI-pBr

2-Hydroxy-5-bromobenzaldehyde (4.0 mmol), o-phenylenediamine (4.4 mol) and catalytic dose of silver nitrate ( $\text{AgNO}_3$ ) were mixed in a 50 mL round-bottom flask with 20 mL dimethylsulfoxide (DMSO). Then, the mixture was stirred for 4 h in a water bath condition ( $35^\circ\text{C}$ ). The TLC template (PE:EA=3:1) was employed to monitor the progress of the reaction. The mixture was cooled to room temperature after finishing and then 60 mL dichloromethane (DCM) was added to the above room mixture, and then a large amount of saturated salt water was applied to extract the organic layer, which was span and dried to obtain the pure (Z)-2-(((2-hydroxyphenyl)imino)methyl)-4-bromophenol. Next, (Z)-2-(((2-hydroxyphenyl)imino)methyl)-4-bromophenol and 2,3-dichloro-5,6-difluoro-p-benzoquinone (DDQ) in a molar ratio of 1:1.1 were mixed in 60 mL dichloromethane. Similarly, the reaction was stirred at  $40^\circ\text{C}$  for 4 h and monitored by TLC (PE:EA=5:1). Finally, by filtration the filtrate was retained and spin-dried and recrystallized with methanol to obtain the target product HBI-pBr,  $^1\text{H}$  NMR (400 MHz,  $\text{DMSO-}d_6$ )  $\delta$  13.32 (s, 2H), 8.32 (d,  $J = 2.5$  Hz, 1H), 7.71 (s, 2H), 7.55 (dd,  $J = 8.8, 2.5$  Hz, 1H), 7.37-7.30 (m, 2H), 7.05 (d,  $J = 8.8$  Hz, 1H).

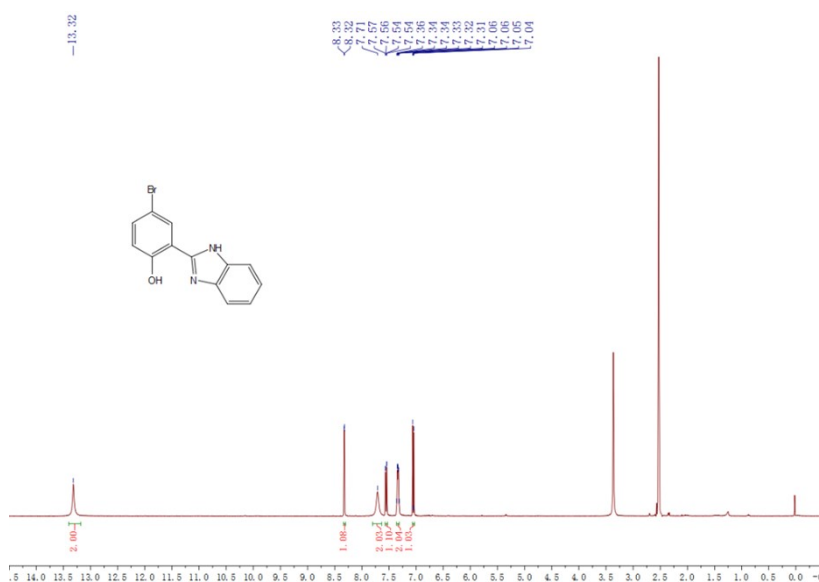

Figure S1.  $^1\text{H}$  NMR spectrum of 2-(2-(2-hydroxy-5'-bromo)phenyl)benzimidazole (HBI-pBr) (400 HZ,  $\text{DMSO-}d_6$ ).

### Preparation of sample solution

To investigate the effect of pH on molecular properties, we conducted titration experiments using standardized trifluoroacetic acid ( $2.0 \times 10^{-4}$  M) and tetrabutylammonium hydroxide ( $2.0 \times 10^{-4}$  M), recording the absorption and emission spectra. All solutions were freshly prepared in methanol, with the procedure involving the addition of  $2.5 \times 10^{-5}$  M HBI-pBr and varying volumes of TFA (0.000, 0.010, 0.020, 0.0035, 0.047, 0.080, 0.125 and 2.000 mL) and TBAOH (0.000, 0.085, 0.110, 0.145, 0.165, 0.185, 0.210, 0.225, 0.230, 0.350, 1.000, 3.000 and 6.000 mL) into several 10 ml volumetric flasks. The experiments were carried out at room temperature (25 °C). The calibration procedure was repeated three times prior to each  $pK_a$  value determination.

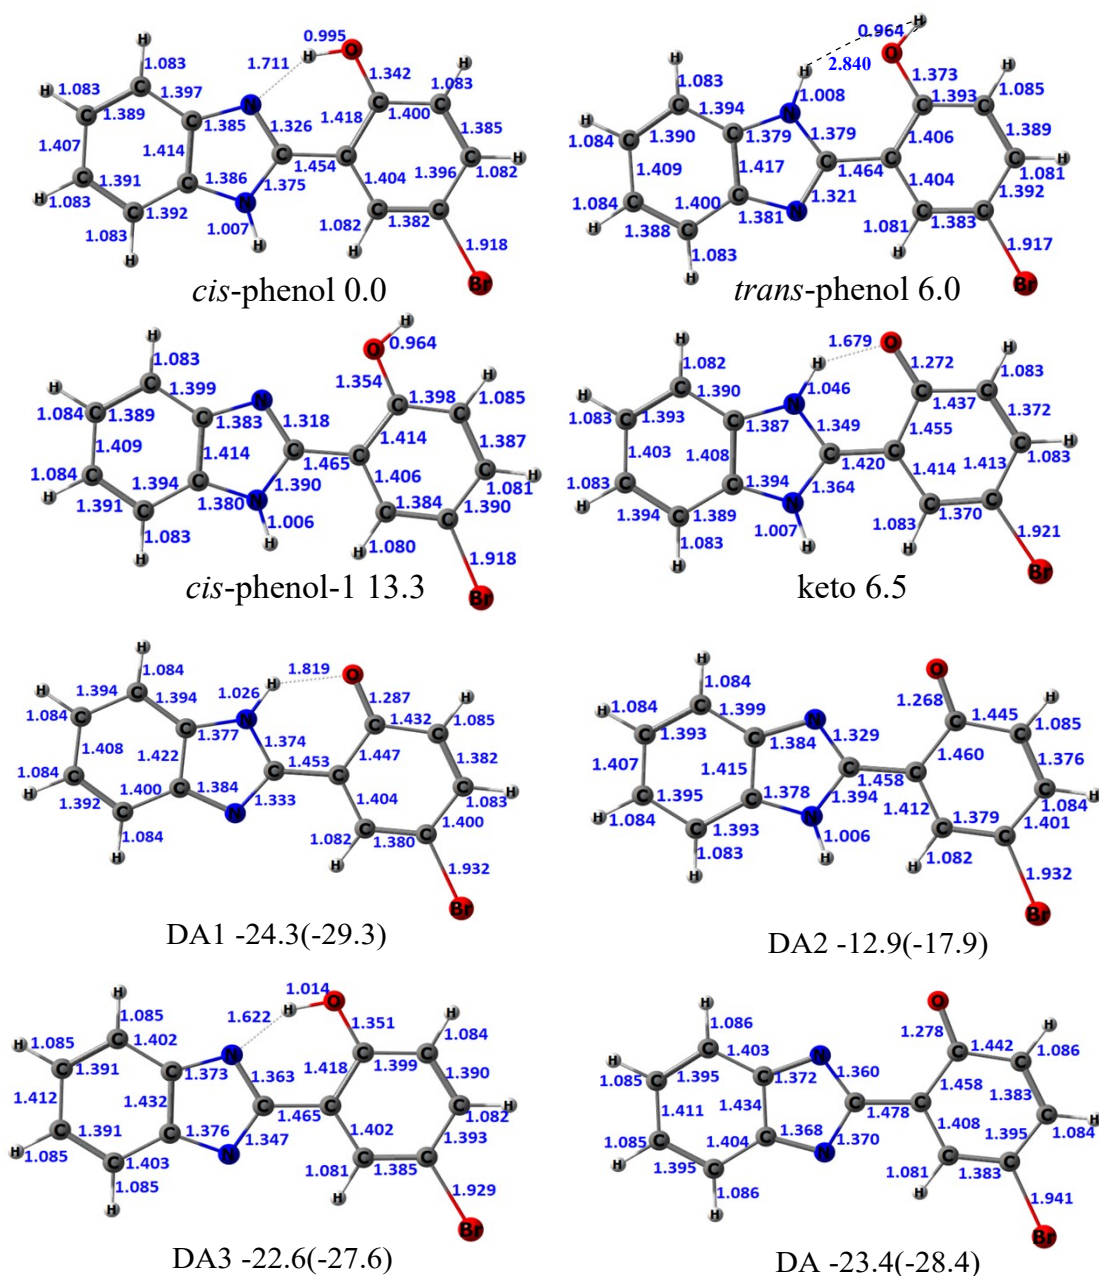

**Figure S2.** Optimized bond length/Å and relative zero-point correction energy/kcal·mol<sup>-1</sup> for *cis*-phenol, keto, and anion of HBI-pBr in S<sub>0</sub> and S<sub>1</sub> at the B3LYP/6-311+G(d, p) level (solvent= methanol) model.

Notes: The data in parentheses represent the relative energy without zero-point correction.

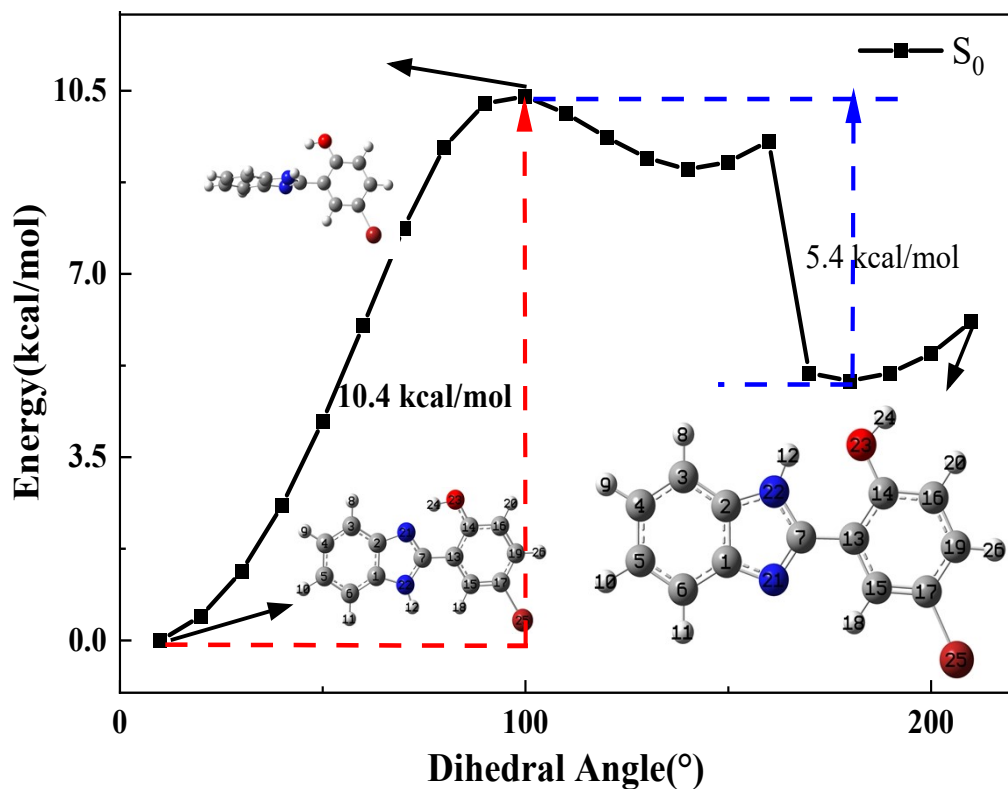

**Figure S3.** Isomerization potential energy surface curves of *cis*-phenol and *trans*-phenol calculated at B3LYP/6-311+G(d, p) level using PCM (solvent=methanol) model. (Note: dihedral angle: C<sub>15</sub>-C<sub>13</sub>-C<sub>7</sub>-N<sub>21</sub>)

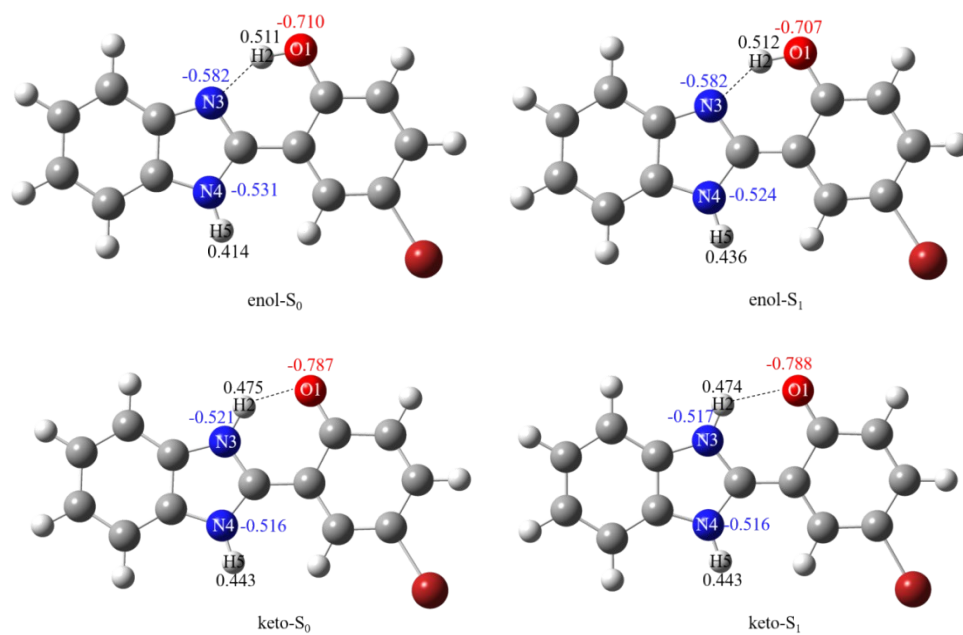

**Figure S4.** Charge distribution of ground HBI-pBr calculated at B3LYP/6-311+G(d, p) using PCM (solvent=methanol) model.

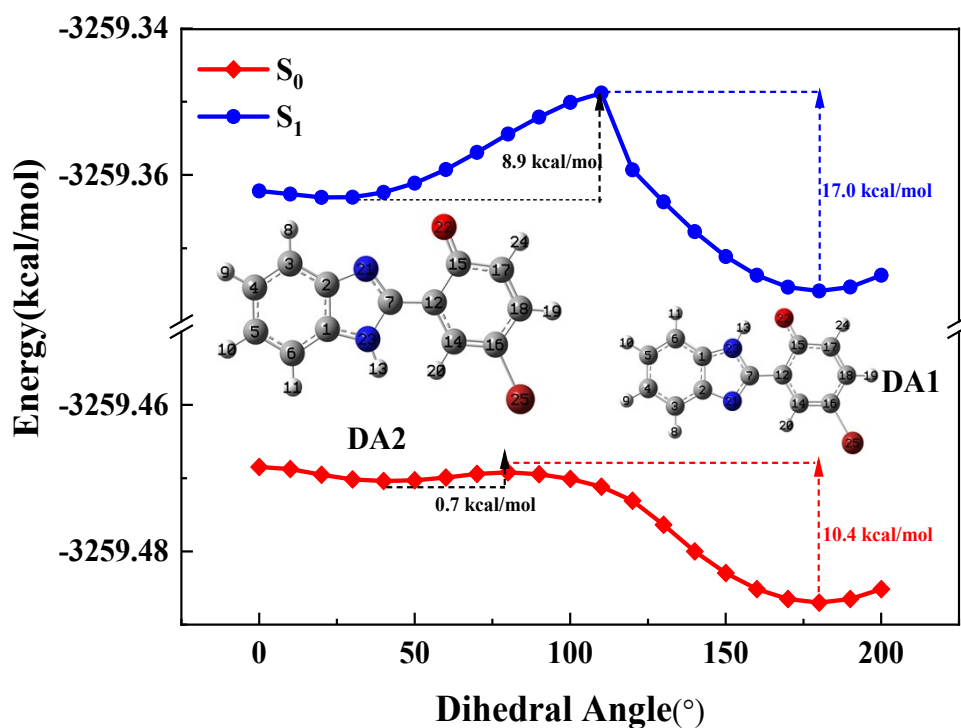

**Figure S5.** Isomerization potential energy surface curves of DA1 and DA2 calculated at TD-B3LYP/6-311+G(d, p) level using PCM (solvent=methanol) model. (Note: Dihedral angle:  $C_{14}-C_{12}-C_7-N_{23}$ ).

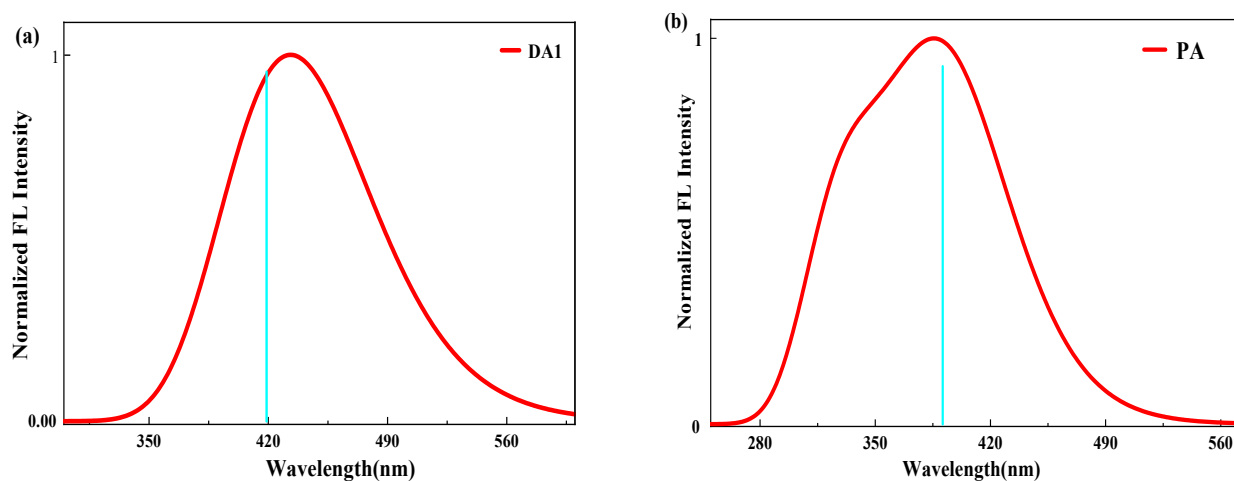

**Figure S6.** Emission spectra of DA1 (a) and PA (b) calculated at the B3LYP-TD/6-311+G(d, p) level using PCM (solvent=methanol) model. Notes: The vertical line represents the maximum emission bands observed experimentally.

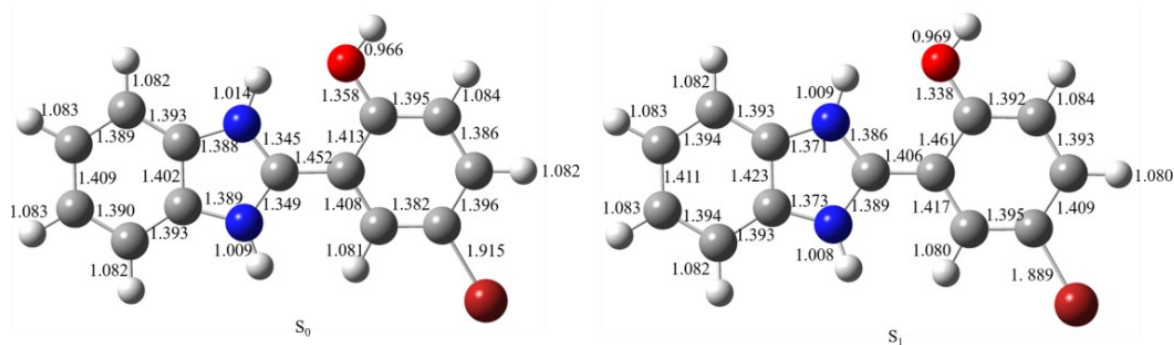

**Figure S7.** Optimized bond length in Å of PA in  $S_0$  and  $S_1$  at B3LYP and TD-B3LYP with the 6-311+G(d, p) basis using PCM (solvent=methanol) model.

**Table S1.** Frontier molecular orbitals (FMO) and their charge distribution composition of 2-(2'-hydroxy)phenylbenzimidazole (HBI) and 2-(2'-hydroxy-5'-bromo)phenylbenzimidazole (HBI-pBr) structures in the optimized  $S_1$  state calculated at the B3LYP/6-311+G(d, p) level.

|         |                   | HOMO   | LUMO   |
|---------|-------------------|--------|--------|
| HBI     |                   |        |        |
|         | Fragment1 (blue)  | 53.74% | 47.25% |
|         | Fragment2 (green) | 46.26% | 52.75% |
| HBI-pBr |                   |        |        |
|         | Fragment1 (blue)  | 42.88% | 44.37% |
|         | Fragment2 (green) | 57.12% | 55.38% |

**Table S2.** Experimental and calculated singlet electronic transition energies ( $\lambda_{abs}^{max}/nm$ ), the corresponding orbital character and oscillator strengths of the *cis*-phenol, *trans*-phenol and keto at the B3LYP-TD/6-311+G(d, p) level using PCM (solvent=cyclohexane) model.

| Species              | States         | Orbitals<br>(coeff.)    | Electronic Transition             | Transition Energies(nm)/<br>Oscillator strength(f) |                              |
|----------------------|----------------|-------------------------|-----------------------------------|----------------------------------------------------|------------------------------|
|                      |                |                         |                                   | Cal                                                | Exp                          |
| <i>cis</i> -phenol   | S <sub>1</sub> | $\pi \rightarrow \pi^*$ | 72→73(0.69325)                    | 333(0.5647)                                        | 344(0.4528)/<br>330 (0.5580) |
|                      | S <sub>2</sub> | $\pi \rightarrow \pi^*$ | 70→73(0.51455)<br>71→73 (0.5580)  | 287(0.2415)                                        | 298 (0.0318)                 |
|                      | S <sub>3</sub> | $\pi \rightarrow \pi^*$ | 72→73(0.69453)                    | 283(0.1252)                                        | 288 (0.0630)                 |
| <i>trans</i> -phenol | S <sub>1</sub> | $\pi \rightarrow \pi^*$ | 72→73(0.69453)                    | 322 (0.7558)                                       |                              |
|                      | S <sub>2</sub> | $\pi \rightarrow \pi^*$ | 71→73(0.69172)                    | 297(0.0297)                                        |                              |
|                      | S <sub>3</sub> | $\pi \rightarrow \pi^*$ | 70→73(0.61932)<br>72→73 (0.29059) | 286 (0.0994)                                       |                              |
| Keto                 | S <sub>1</sub> | $\pi \rightarrow \pi^*$ | 72→73(0.70423)                    | 406.0(0.4371)                                      |                              |
|                      | S <sub>4</sub> | $\pi \rightarrow \pi^*$ | 72→74(0.69740)                    | 293.7(0.0019)                                      |                              |
|                      | S <sub>5</sub> | $\pi \rightarrow \pi^*$ | 70→73(0.69748)                    | 286.6(0.4370)                                      |                              |

**cis-phenol**

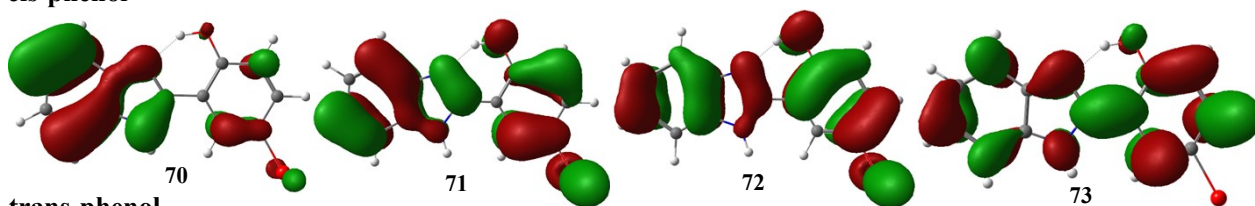

**trans-phenol**

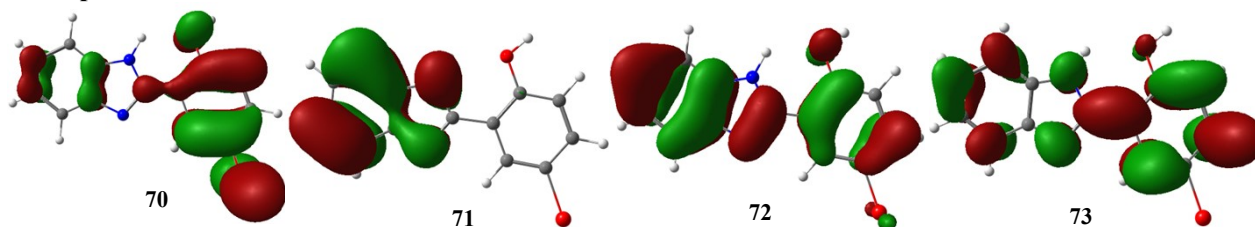



**Table S3.** Experimental and calculated singlet electronic transition energies ( $\lambda_{abs}^{max}/\text{nm}$ ), the corresponding orbital character and oscillator strengths of the DA1, DA2, DA3 and DA at the B3LYP-TD/6-311+G(d, p) level using PCM (solvent=methanol) model.

| Species    | State                | Electronic<br>Transition | Orbitals (coeff.)                | Transition Energies(nm)/      |                    |
|------------|----------------------|--------------------------|----------------------------------|-------------------------------|--------------------|
|            |                      |                          |                                  | Oscillator strength(f)<br>Cal | Exp                |
| <b>DA1</b> | <b>S<sub>1</sub></b> | $\pi \rightarrow \pi^*$  | <b>72→73(0.70040)</b>            | <b>374(0.4398)</b>            | <b>360(0.4234)</b> |
|            | S <sub>4</sub>       | $\pi \rightarrow \pi^*$  | 71→73(0.46298)<br>72→75(0.48994) | 286(0.1426)                   | 298 (0.0008)       |
|            | S <sub>5</sub>       | $\pi \rightarrow \pi^*$  | 71→73(0.49678)                   | 282(0.1314)                   | 289 (0.1014)       |
|            | S <sub>11</sub>      | $\pi \rightarrow \pi^*$  | 72→79(0.63511)                   | 248(0.3057)                   | 253 (0.1112)       |
|            | S <sub>15</sub>      | $\pi \rightarrow \pi^*$  | 67→73(0.63485)<br>72→82(0.27972) | 231(0.0003)                   | 225 (0.0011)       |
| <b>DA2</b> | S <sub>1</sub>       | $\pi \rightarrow \pi^*$  | 72→73(0.70218)                   | 393(0.4670)                   |                    |
|            | S <sub>4</sub>       | $\pi \rightarrow \pi^*$  | 72→75(0.68941)                   | 298(0.0036)                   |                    |
|            | S <sub>6</sub>       | $\pi \rightarrow \pi^*$  | 70→73(0.63431)                   | 283(0.2591)                   |                    |
|            | S <sub>12</sub>      | $\pi \rightarrow \pi^*$  | 72→79(0.58786)                   | 256(0.2961)                   |                    |
|            | S <sub>14</sub>      | $\pi \rightarrow \pi^*$  | 72→81(0.60400)                   | 252(0.0344)                   |                    |
| <b>DA3</b> | <b>S<sub>1</sub></b> | $\pi \rightarrow \pi^*$  | <b>72→73(0.69280)</b>            | <b>331(0.6356)</b>            |                    |
|            | S <sub>2</sub>       | $\pi \rightarrow \pi^*$  | 71→73(0.94810)                   | 308(0.0658)                   |                    |
|            | S <sub>4</sub>       | $\pi \rightarrow \pi^*$  | 70→73(0.52836)                   | 285(0.0749)                   |                    |
|            | S <sub>6</sub>       | $\pi \rightarrow \pi^*$  | 71→75(0.67129)                   | 258(0.0284)                   |                    |
| <b>DA</b>  | <b>S<sub>1</sub></b> | $\pi \rightarrow \pi^*$  | <b>72→73(0.69902)</b>            | <b>379(0.4995)</b>            |                    |
|            | S <sub>6</sub>       | $\pi \rightarrow \pi^*$  | 72→76(0.63649)                   | 297(0.0533)                   |                    |
|            | S <sub>8</sub>       | $\pi \rightarrow \pi^*$  | 70→73(0.63117)                   | 291(0.1519)                   |                    |
|            | S <sub>12</sub>      | $\pi \rightarrow \pi^*$  | 72→79(0.60933)                   | 267(0.1012)                   |                    |



**Table S4.** Calculated singlet electronic transition orbitals of the DA1 at the B3LYP-TD/6-311+G(d, p) level using PCM (solvent=methanol) model.

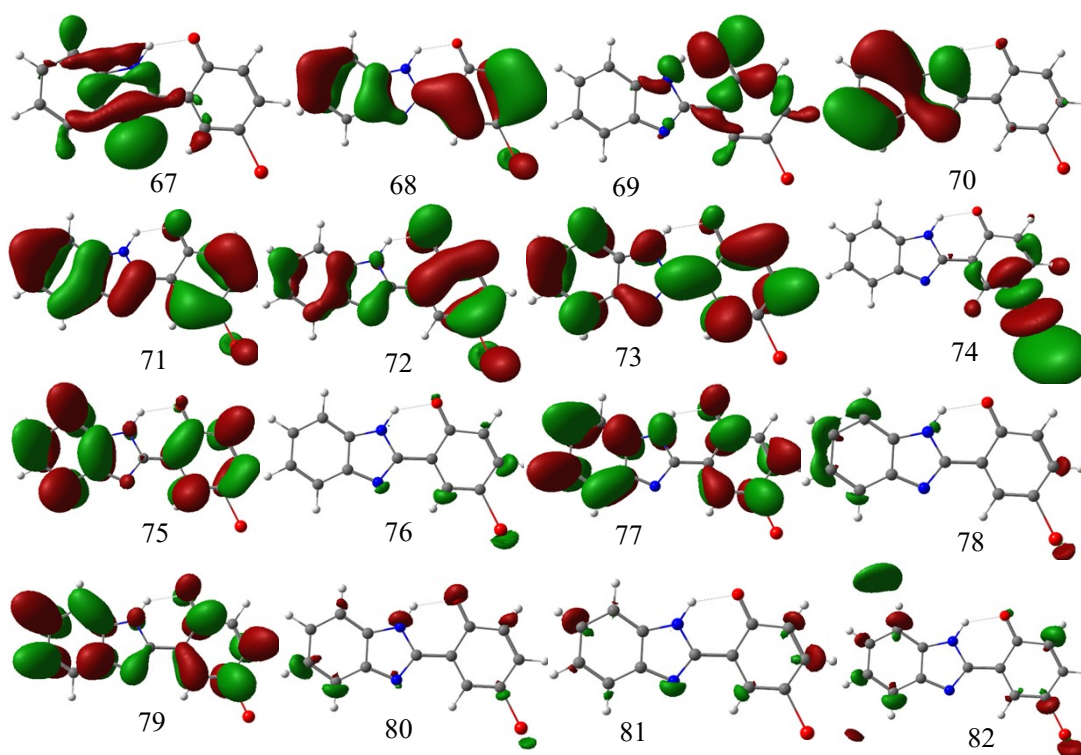

**Table S5.** Experimental and calculated singlet electronic transition energies ( $\lambda_{abs}^{max}/nm$ ), the corresponding orbital character and oscillator strengths of PA at the B3LYP-TD/6-311+G(d, p) level using PCM (solvent=methanol) model.

| States          | Orbitals(coeff.)        | Electronic Transition        | Transition Energies(nm)/Oscillator strength(f) |         |
|-----------------|-------------------------|------------------------------|------------------------------------------------|---------|
|                 |                         |                              | Cal.                                           | Exp.    |
| S <sub>1</sub>  | $\pi \rightarrow \pi^*$ | 72 $\rightarrow$ 73(0.68823) | 339(0.3969)                                    | 346/338 |
| S <sub>2</sub>  | $\pi \rightarrow \pi^*$ | 71 $\rightarrow$ 73(0.66324) | 300 (0.4017)                                   | 300     |
| S <sub>3</sub>  | $\pi \rightarrow \pi^*$ | 70 $\rightarrow$ 73(0.67595) | 295 (0.1230)                                   | 289     |
|                 |                         | 72 $\rightarrow$ 75(0.41797) |                                                |         |
| S <sub>7</sub>  | $\pi \rightarrow \pi^*$ | 72 $\rightarrow$ 74(0.25093) | 236(0.0194)                                    | 240     |
|                 |                         | 70 $\rightarrow$ 77(0.25036) |                                                |         |
| S <sub>10</sub> | $\pi \rightarrow \pi^*$ | 71 $\rightarrow$ 74(0.56672) | 218(0.2541)                                    | 217     |
|                 |                         | 72 $\rightarrow$ 77(0.21126) |                                                |         |

**Table S6.** Calculated singlet electronic transition orbitals of the PA at the B3LYP-TD/6-311+G(d, p) level using PCM (solvent=methanol) model.

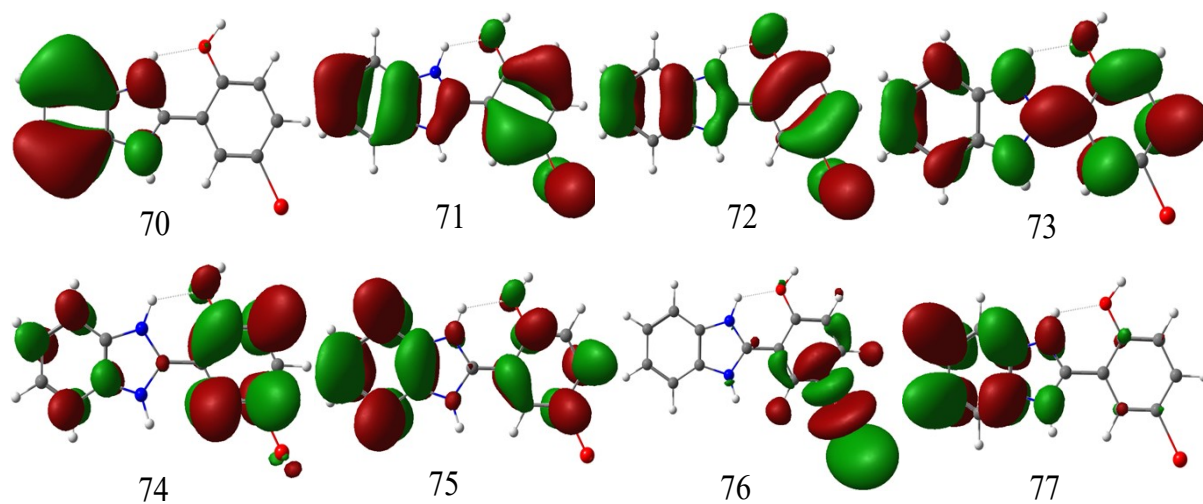

**Table S7.** NICS(1)<sub>ZZ</sub> values (in ppm) of every ring in HBI-pBr structures in the optimized S<sub>0</sub> and S<sub>1</sub> states calculated at the B3LYP/6-311+G(d, p) level.

| System | S <sub>0</sub> <sup>a</sup> |        |        | S <sub>1</sub> <sup>a</sup> |       |       |
|--------|-----------------------------|--------|--------|-----------------------------|-------|-------|
|        | R1                          | R2     | R3     | R1                          | R2    | R3    |
| Phenol | -28.53                      | -22.87 | -20.40 | 15.64                       | 0.51  | 21.88 |
| Keto   | -28.55                      | -18.42 | -14.26 | -19.74                      | 7.07  | 10.82 |
| Anion  | -28.26                      | -24.88 | -16.30 | -12.20                      | -8.89 | 24.87 |
| Cation | -29.05                      | -20.39 | -20.22 | -8.36                       | -3.45 | 22.54 |

<sup>a</sup> Corresponding the benzyl, imizole and phenol rings indicated in left structure.

**Table S8.** Cartesian coordinates of phenol, keto, DA1, DA2, DA3, DA and PA of HBI-pBr in the optimized  $S_0$  and  $S_1$  states calculated at the B3LYP/6-311+G(d, p) level using PCM (solvent=methanol) model.

| HBI-pBr |           |           |           |    |          |           |           |
|---------|-----------|-----------|-----------|----|----------|-----------|-----------|
| Phenol  |           |           |           |    |          |           |           |
|         | $S_0$     |           |           |    | $S_1$    |           |           |
| C       | -2.923718 | -1.013599 | -0.000069 | C  | -2.92307 | -1.027107 | 0.000076  |
| C       | -3.251582 | 0.361916  | 0.000203  | C  | -3.24011 | 0.383007  | -0.0001   |
| C       | -4.589999 | 0.765757  | 0.000247  | C  | -4.59292 | 0.791679  | -0.0001   |
| C       | -5.563972 | -0.22582  | 0.000079  | C  | -5.56579 | -0.196382 | 0.000139  |
| C       | -5.222383 | -1.592302 | -0.000165 | C  | -5.23484 | -1.572625 | 0.000358  |
| C       | -3.89568  | -2.011707 | -0.000291 | C  | -3.90585 | -2.009159 | 0.00032   |
| C       | -1.079915 | 0.236646  | 0.000132  | C  | -1.05336 | 0.216914  | -0.000023 |
| H       | -4.851317 | 1.816829  | 0.000413  | H  | -4.84758 | 1.843761  | -0.000236 |
| H       | -6.61028  | 0.055182  | 0.00013   | H  | -6.61181 | 0.086528  | 0.000171  |
| H       | -6.011386 | -2.334613 | -0.000292 | H  | -6.03249 | -2.305509 | 0.000546  |
| H       | -3.633233 | -3.062294 | -0.000535 | H  | -3.65603 | -3.062424 | 0.00047   |
| H       | -0.980121 | -1.893559 | 0.001343  | H  | -1.00782 | -1.936824 | 0.001343  |
| C       | 0.31956   | 0.636148  | 0.000038  | C  | 0.29153  | 0.58594   | 0.000016  |
| C       | 0.645972  | 2.016170  | -0.000093 | C  | 0.64705  | 2.009634  | 0.000257  |
| C       | 1.358109  | -0.309322 | 0.000109  | C  | 1.36864  | -0.359608 | -0.000178 |
| C       | 1.990002  | 2.404806  | -0.000241 | C  | 1.98173  | 2.409787  | 0.000329  |
| C       | 2.677048  | 0.10604   | -0.000032 | C  | 2.67142  | 0.097025  | -0.000062 |
| H       | 1.138181  | -1.368019 | 0.000267  | H  | 1.16847  | -1.421013 | -0.000464 |
| C       | 3.006143  | 1.461737  | -0.000216 | C  | 3.01257  | 1.463945  | 0.000198  |
| H       | 2.222110  | 3.462470  | -0.000377 | H  | 2.20006  | 3.470158  | 0.00051   |
| N       | -2.08416  | 1.107065  | 0.000367  | N  | -2.10407 | 1.108097  | -0.000183 |
| N       | -1.540064 | -1.055441 | -0.000466 | N  | -1.55464 | -1.090397 | -0.000176 |
| O       | -0.292327 | 2.981608  | -0.000106 | O  | -0.30212 | 2.939439  | 0.000445  |
| H       | -1.187743 | 2.540186  | 0.000184  | H  | -1.20625 | 2.47869   | 0.00034   |
| Br      | 4.078962  | -1.206483 | 0.000073  | Br | 4.09231  | -1.180687 | -0.000325 |
| H       | 4.040808  | 1.777689  | -0.000339 | H  | 4.04821  | 1.77297   | 0.000281  |

  

| Keto |          |          |          |   |          |          |          |
|------|----------|----------|----------|---|----------|----------|----------|
|      | $S_0$    |          |          |   | $S_1$    |          |          |
| C    | -2.93823 | -1.00878 | 0.000472 | C | -2.92378 | -0.9817  | 0.000463 |
| C    | -3.26748 | 0.360244 | 0.000449 | C | -3.2961  | 0.386638 | 0.000408 |
| C    | -4.59191 | 0.783109 | 0.000609 | C | -4.63767 | 0.770115 | 0.000588 |
| C    | -5.57396 | -0.20500 | 0.000804 | C | -5.59092 | -0.25319 | 0.000842 |
| C    | -5.24300 | -1.56815 | 0.000828 | C | -5.22113 | -1.60496 | 0.000908 |
| C    | -3.91606 | -1.99516 | 0.000655 | C | -3.87626 | -1.99593 | 0.000717 |
| C    | -1.03036 | 0.191492 | 0.000137 | C | -1.03565 | 0.276446 | 0.000063 |
| H    | -4.84479 | 1.835331 | 0.000579 | H | -4.9226  | 1.814048 | 0.000541 |
| H    | -6.61683 | 0.086578 | 0.000933 | H | -6.64246 | 0.007316 | 0.000991 |
| H    | -6.03501 | -2.30658 | 0.000979 | H | -5.99172 | -2.36605 | 0.001108 |

|    |          |          |           |    |          |          |          |
|----|----------|----------|-----------|----|----------|----------|----------|
| H  | -3.66132 | -3.04742 | 0.000667  | H  | -3.58782 | -3.03914 | 0.000768 |
| H  | -0.99641 | -1.91515 | 0.00034   | H  | -0.98564 | -1.84761 | 0.000295 |
| C  | 0.326719 | 0.609087 | -0.000067 | C  | 0.334833 | 0.653213 | -0.00016 |
| C  | 0.587908 | 2.039968 | -0.000066 | C  | 0.697913 | 2.088461 | -0.00022 |
| C  | 1.383889 | -0.33036 | -0.000264 | C  | 1.359569 | -0.29795 | -0.00036 |
| C  | 1.975988 | 2.411692 | -0.000169 | C  | 2.082086 | 2.423608 | -0.00012 |
| C  | 2.683858 | 0.10226  | -0.000428 | C  | 2.711874 | 0.114488 | -0.00044 |
| H  | 1.176443 | -1.39377 | -0.000291 | H  | 1.146989 | -1.35793 | -0.00045 |
| C  | 2.98495  | 1.482515 | -0.00037  | C  | 3.090144 | 1.453384 | -0.00027 |
| H  | 2.201193 | 3.471297 | -0.000091 | H  | 2.333654 | 3.477463 | 0.000069 |
| N  | -2.06694 | 1.054073 | 0.000211  | N  | -2.12998 | 1.109412 | 0.00015  |
| N  | -1.54586 | -1.07147 | 0.000256  | N  | -1.54322 | -1.00861 | 0.000225 |
| O  | -0.34006 | 2.910397 | 0.000308  | O  | -0.21055 | 2.975964 | 0.000272 |
| H  | -1.78917 | 2.062527 | 0.000098  | H  | -1.98662 | 2.115324 | 0.000055 |
| Br | 4.121779 | -1.17126 | -0.000686 | Br | 4.049412 | -1.23563 | -0.00064 |
| H  | 4.019791 | 1.802271 | -0.000475 | H  | 4.134127 | 1.734605 | -0.00024 |

---

DA1

| $S_0$ |           |           | $S_1$     |    |          |           |           |
|-------|-----------|-----------|-----------|----|----------|-----------|-----------|
| C     | 3.3036    | 0.36279   | 0.000044  | C  | 3.284429 | 0.360931  | 0.000048  |
| C     | 2.844587  | -0.974686 | 0.000316  | C  | 2.871323 | -0.99963  | 0.000148  |
| C     | 3.759211  | -2.032    | 0.00036   | C  | 3.83619  | -2.014265 | 0.000196  |
| C     | 5.112593  | -1.715449 | 0.000192  | C  | 5.179224 | -1.646718 | 0.000144  |
| C     | 5.555177  | -0.37826  | -0.000052 | C  | 5.570425 | -0.294392 | 0.000041  |
| C     | 4.658778  | 0.685934  | -0.000178 | C  | 4.627707 | 0.732285  | -0.000019 |
| C     | 1.076972  | 0.293134  | 0.000245  | C  | 1.067814 | 0.187932  | 0.000016  |
| H     | 3.417579  | -3.059777 | 0.000526  | H  | 3.539593 | -3.056968 | 0.000271  |
| H     | 5.846167  | -2.512688 | 0.000243  | H  | 5.942543 | -2.416478 | 0.000187  |
| H     | 6.618921  | -0.17332  | -0.000179 | H  | 6.625579 | -0.046813 | 0.000008  |
| H     | 4.999196  | 1.713906  | -0.000422 | H  | 4.928006 | 1.773416  | -0.000104 |
| H     | 2.132471  | 2.146146  | 0.001456  | H  | 1.896445 | 2.084694  | 0.000183  |
| C     | -0.319078 | 0.704446  | 0.000151  | C  | -0.30861 | 0.653398  | 0.000034  |
| C     | -1.33324  | -0.286756 | 0.00002   | C  | -1.34324 | -0.2959   | -0.000036 |
| C     | -0.690561 | 2.058882  | 0.000222  | C  | -0.60045 | 2.071147  | 0.000182  |
| C     | -2.676635 | 0.104069  | -0.000128 | C  | -2.6632  | 0.107589  | -0.000064 |
| C     | -2.02706  | 2.413703  | 0.000081  | C  | -1.99105 | 2.413947  | 0.000069  |
| C     | -3.030473 | 1.444487  | -0.000103 | C  | -2.99784 | 1.467413  | -0.000033 |
| N     | 1.459633  | -0.979544 | 0.00048   | N  | 1.489802 | -1.07673  | 0.000184  |
| N     | 2.157065  | 1.138489  | -0.000353 | N  | 2.111583 | 1.08169   | -0.000038 |
| H     | -4.073623 | 1.731185  | -0.000226 | H  | -4.03649 | 1.775719  | -0.000073 |
| H     | -1.073268 | -1.324694 | 0.000034  | H  | -1.08102 | -1.345743 | -0.000085 |
| O     | 0.304306  | 3.086081  | 0.000431  | O  | 0.312565 | 2.978698  | 0.000172  |
| H     | -2.296219 | 3.449297  | 0.000113  | H  | -2.24301 | 3.469057  | 0.000091  |
| Br    | -4.020737 | -1.252945 | -0.000368 | Br | -4.0708  | -1.216103 | -0.000207 |

---

| DA2            |           |           |                |    |           |           |           |
|----------------|-----------|-----------|----------------|----|-----------|-----------|-----------|
| S <sub>0</sub> |           |           | S <sub>1</sub> |    |           |           |           |
| C              | -2.934359 | -0.988933 | -0.000068      | C  | -2.862038 | -0.948364 | 0.000419  |
| C              | -3.258986 | 0.38735   | 0.000204       | C  | -3.273455 | 0.405447  | 0.000065  |
| C              | -4.596448 | 0.794339  | 0.000248       | C  | -4.638059 | 0.714275  | -0.000105 |
| C              | -5.572752 | -0.194943 | 0.00008        | C  | -5.550535 | -0.338169 | 0.000113  |
| C              | -5.23438  | -1.562225 | -0.000164      | C  | -5.122344 | -1.678285 | 0.000479  |
| C              | -3.908667 | -1.984751 | -0.00029       | C  | -3.7669   | -2.007174 | 0.000623  |
| C              | -1.087619 | 0.25697   | 0.000133       | C  | -1.100723 | 0.449647  | 0.000189  |
| H              | -4.855292 | 1.846023  | 0.000414       | H  | -4.969237 | 1.746408  | -0.000399 |
| H              | -6.618395 | 0.08852   | 0.000131       | H  | -6.613028 | -0.123733 | -0.000012 |
| H              | -6.025127 | -2.302678 | -0.000291      | H  | -5.860492 | -2.471802 | 0.000635  |
| H              | -3.648693 | -3.035953 | -0.000534      | H  | -3.437102 | -3.039251 | 0.000883  |
| H              | -0.992838 | -1.873464 | 0.001344       | H  | -0.876972 | -1.691578 | 0.001598  |
| C              | 0.312792  | 0.653177  | 0.000039       | C  | 0.305338  | 0.835933  | 0.000143  |
| C              | 0.64245   | 2.032427  | -0.000092      | C  | 0.728103  | 2.233184  | 0.000487  |
| C              | 1.349113  | -0.294734 | 0.00011        | C  | 1.280178  | -0.184986 | -0.000256 |
| C              | 1.987391  | 2.417899  | -0.00024       | C  | 2.158171  | 2.43956   | 0.000558  |
| C              | 2.669026  | 0.117523  | -0.000031      | C  | 2.630237  | 0.096064  | -0.000204 |
| H              | 1.126694  | -1.352911 | 0.000268       | H  | 0.987202  | -1.226489 | -0.000717 |
| C              | 3.00131   | 1.472442  | -0.000215      | C  | 3.084052  | 1.421492  | 0.00023   |
| H              | 2.221988  | 3.475014  | -0.000376      | H  | 2.493795  | 3.471344  | 0.000873  |
| N              | -2.089813 | 1.129749  | 0.000368       | N  | -2.169433 | 1.239966  | -0.000073 |
| N              | -1.550808 | -1.034031 | -0.000465      | N  | -1.485536 | -0.890687 | 0.000335  |
| O              | -0.293574 | 3.000071  | -0.000105      | O  | -0.056493 | 3.229365  | 0.000756  |
| Br             | 4.067847  | -1.198295 | 0.000074       | Br | 3.912435  | -1.349066 | -0.000785 |
| H              | 4.036716  | 1.785958  | -0.000338      | H  | 4.145178  | 1.640798  | 0.000281  |

| DA3            |           |           |                |   |           |           |           |
|----------------|-----------|-----------|----------------|---|-----------|-----------|-----------|
| S <sub>0</sub> |           |           | S <sub>1</sub> |   |           |           |           |
| C              | 2.92908   | -1.031089 | 0.00006        | C | -2.86942  | -1.014668 | -0.000015 |
| C              | 3.258938  | 0.343949  | -0.000212      | C | -3.25338  | 0.364661  | 0.00009   |
| C              | 4.59794   | 0.745848  | -0.000256      | C | -4.605142 | 0.735477  | 0.000179  |
| C              | 5.570474  | -0.24714  | -0.000088      | C | -5.559939 | -0.27671  | 0.000162  |
| C              | 5.226903  | -1.613125 | 0.000156       | C | -5.185491 | -1.638106 | 0.000055  |
| C              | 3.899594  | -2.030606 | 0.000282       | C | -3.84786  | -2.020564 | -0.000035 |
| C              | 1.087092  | 0.221828  | -0.000141      | C | -1.104261 | 0.191266  | -0.000015 |
| H              | 4.860781  | 1.79654   | -0.000422      | H | -4.897556 | 1.780258  | 0.00026   |
| H              | 6.617187  | 0.032344  | -0.000139      | H | -6.613283 | -0.018451 | 0.000231  |
| H              | 6.014829  | -2.35658  | 0.000283       | H | -5.959304 | -2.398102 | 0.000044  |
| H              | 3.635623  | -3.080811 | 0.000526       | H | -3.566478 | -3.068468 | -0.000113 |
| C              | -0.311802 | 0.623359  | -0.000047      | C | 0.294653  | 0.626372  | -0.000019 |
| C              | -0.636213 | 2.003853  | 0.000084       | C | 0.620462  | 2.006071  | 0.000048  |
| C              | -1.351721 | -0.320604 | -0.000118      | C | 1.335887  | -0.312542 | -0.00007  |
| C              | -1.979678 | 2.394438  | 0.000232       | C | 1.962438  | 2.401377  | 0.000071  |

|    |           |           |           |    |           |           |           |
|----|-----------|-----------|-----------|----|-----------|-----------|-----------|
| C  | -2.670057 | 0.09667   | 0.000023  | C  | 2.655065  | 0.10811   | -0.000046 |
| H  | -1.133329 | -1.379619 | -0.000276 | H  | 1.081549  | -1.363278 | -0.000119 |
| C  | -2.997185 | 1.452843  | 0.000207  | C  | 2.986545  | 1.461235  | 0.000027  |
| H  | -2.210252 | 3.452437  | 0.000368  | H  | 2.192652  | 3.460146  | 0.000123  |
| N  | 2.092598  | 1.09079   | -0.000376 | N  | -2.10484  | 1.117383  | 0.000088  |
| N  | 1.545367  | -1.070925 | 0.000457  | N  | -1.495793 | -1.097964 | -0.000076 |
| O  | 0.303485  | 2.967929  | 0.000097  | O  | -0.334035 | 2.961752  | 0.000081  |
| H  | 1.19826   | 2.525209  | -0.000193 | H  | -1.227345 | 2.481034  | 0.000021  |
| Br | -4.073872 | -1.213818 | -0.000082 | Br | 4.064818  | -1.207857 | -0.000109 |
| H  | -4.031391 | 1.770295  | 0.00033   | H  | 4.020488  | 1.780041  | 0.000046  |

---

| DA             |           |           |                |    |           |           |           |
|----------------|-----------|-----------|----------------|----|-----------|-----------|-----------|
| S <sub>0</sub> |           |           | S <sub>1</sub> |    |           |           |           |
| C              | 3.317207  | 0.39009   | 0.000054       | C  | 3.280453  | 0.410821  | -0.00005  |
| C              | 2.863109  | -0.949063 | 0.000326       | C  | 2.800694  | -0.940048 | 0.000164  |
| C              | 3.78161   | -2.00301  | 0.00037        | C  | 3.705528  | -2.013784 | 0.000292  |
| C              | 5.133821  | -1.681491 | 0.000202       | C  | 5.071075  | -1.730543 | 0.000211  |
| C              | 5.571491  | -0.342685 | -0.000042      | C  | 5.542757  | -0.400508 | 0.00001   |
| C              | 4.671189  | 0.718209  | -0.000168      | C  | 4.657587  | 0.677502  | -0.000121 |
| C              | 1.09085   | 0.312256  | 0.000255       | C  | 1.128102  | 0.422836  | 0.000019  |
| H              | 3.443756  | -3.032036 | 0.000536       | H  | 3.35145   | -3.040576 | 0.000431  |
| H              | 5.870318  | -2.47603  | 0.000253       | H  | 5.787216  | -2.545981 | 0.000299  |
| H              | 6.634475  | -0.13384  | -0.000169      | H  | 6.612318  | -0.217443 | -0.00004  |
| H              | 5.007829  | 1.747425  | -0.000412      | H  | 5.02507   | 1.69968   | -0.000261 |
| C              | -0.306701 | 0.718438  | 0.000161       | C  | -0.284699 | 0.85703   | -0.000005 |
| C              | -1.317216 | -0.276482 | 0.00003        | C  | -1.24884  | -0.168438 | -0.000056 |
| C              | -0.683157 | 2.071501  | 0.000232       | C  | -0.726286 | 2.246211  | 0.000033  |
| C              | -2.662037 | 0.109407  | -0.000118      | C  | -2.606386 | 0.095802  | -0.00005  |
| C              | -2.020949 | 2.421411  | 0.000091       | C  | -2.155955 | 2.436652  | 0.000078  |
| C              | -3.020796 | 1.448516  | -0.000093      | C  | -3.08004  | 1.408335  | 0.000024  |
| N              | 1.478183  | -0.959008 | 0.00049        | N  | 1.433404  | -0.912267 | 0.000155  |
| N              | 2.167831  | 1.161572  | -0.000343      | N  | 2.200819  | 1.258068  | -0.000102 |
| H              | -4.064992 | 1.73138   | -0.000216      | H  | -4.143192 | 1.619456  | 0.000043  |
| H              | -1.053434 | -1.313458 | 0.000044       | H  | -0.888482 | -1.187848 | -0.000091 |
| O              | 0.307932  | 3.102347  | 0.000441       | O  | 0.044078  | 3.265988  | 0.000102  |
| H              | -2.29391  | 3.456008  | 0.000124       | H  | -2.503723 | 3.465321  | 0.00015   |
| Br             | -4.001146 | -1.252536 | -0.000358      | Br | -3.87248  | -1.375781 | -0.000143 |

---

|    |          | PA             |           |    |                |           |           |
|----|----------|----------------|-----------|----|----------------|-----------|-----------|
|    |          | S <sub>0</sub> |           |    | S <sub>1</sub> |           |           |
| C  | -2.9184  | -1.038657      | -0.000071 | C  | -2.89979       | -1.000997 | 0.000338  |
| C  | -3.24701 | 0.336682       | 0.000201  | C  | -3.2954        | 0.345357  | 0.000067  |
| C  | -4.58564 | 0.739804       | 0.000245  | C  | -4.63814       | 0.714126  | -0.000079 |
| C  | -5.55908 | -0.252296      | 0.000077  | C  | -5.56455       | -0.320999 | 0.000007  |
| C  | -5.21676 | -1.618595      | -0.000167 | C  | -5.1666        | -1.671739 | 0.000342  |
| C  | -3.88983 | -2.037287      | -0.000293 | C  | -3.82679       | -2.039435 | 0.000467  |
| C  | -1.07527 | 0.212578       | 0.00013   | C  | -1.05203       | 0.276497  | 0.00017   |
| H  | -4.84752 | 1.790735       | 0.000411  | H  | -4.94023       | 1.752903  | -0.000301 |
| H  | -6.60554 | 0.028144       | 0.000128  | H  | -6.62075       | -0.083545 | -0.000033 |
| H  | -6.00536 | -2.361329      | -0.000294 | H  | -5.92514       | -2.444123 | 0.000444  |
| H  | -3.62682 | -3.087733      | -0.000537 | H  | -3.51652       | -3.075753 | 0.000668  |
| H  | -0.97433 | -1.917573      | 0.001341  | H  | -0.92895       | -1.817731 | 0.001171  |
| C  | 0.323988 | 0.612832       | 0.000036  | C  | 0.340095       | 0.680398  | 0.000122  |
| C  | 0.649659 | 1.993029       | -0.000095 | C  | 0.712577       | 2.041672  | 0.000347  |
| C  | 1.363044 | -0.332081      | 0.000107  | C  | 1.353111       | -0.296395 | -0.000174 |
| C  | 1.99348  | 2.382386       | -0.000243 | C  | 2.060569       | 2.397214  | 0.00035   |
| C  | 2.68176  | 0.08399        | -0.000034 | C  | 2.682432       | 0.077974  | -0.000173 |
| H  | 1.143685 | -1.390896      | 0.000265  | H  | 1.107527       | -1.348694 | -0.000487 |
| C  | 3.010127 | 1.439863       | -0.000218 | C  | 3.047692       | 1.424614  | 0.0001    |
| H  | 2.22502  | 3.440175       | -0.000379 | H  | 2.335189       | 3.445197  | 0.000547  |
| N  | -2.07999 | 1.082458       | 0.000365  | N  | -2.12332       | 1.090359  | -0.000015 |
| N  | -1.53473 | -1.079756      | -0.000468 | N  | -1.5098        | -0.992439 | 0.0003    |
| O  | -0.28916 | 2.957963       | -0.000108 | O  | -0.27215       | 2.975578  | 0.000562  |
| Br | 4.084379 | -1.22778       | 0.000071  | Br | 4.040936       | -1.267801 | -0.000593 |
| H  | 4.044622 | 1.756371       | -0.000341 | H  | 4.089888       | 1.71335   | 0.0001    |
| H  | -2.00757 | 2.079832       | 0.000612  | H  | -2.03261       | 2.100042  | -0.000254 |
| H  | 0.136411 | 3.81848        | -0.00012  | H  | 0.088757       | 3.871598  | 0.000733  |
